# Supplementary material
Source: PubMed Central journal article supplement (PMC6112743)

## Supporting Information

Table S1. Parameters from Boltzmann Equation fits to GV data.

| Boltzmann Coefficients |            | Offset |   |       | G/G <sub>max</sub> |   |       | V <sub>1/2</sub> (mV) |   |     | Slope (mV) |   |       |     |
|------------------------|------------|--------|---|-------|--------------------|---|-------|-----------------------|---|-----|------------|---|-------|-----|
| Construct              |            | mean   | ± | sem   | mean               | ± | sem   | mean                  | ± | sem | mean       | ± | sem   | n = |
| SpiHwt                 | No cNMP*   | -0.013 | ± | 0.016 | 0.033              | ± | 0.021 | -74                   | ± | 13  | -38.3      | ± | 34.8  | 11  |
|                        | cAMP       | 0.008  | ± | 0.003 | 1                  | ± | 0     | -67                   | ± | 2   | -6.1       | ± | 0.2   | 11  |
|                        | cGMP       | -0.001 | ± | 0.003 | 0.372              | ± | 0.020 | -71                   | ± | 1   | -6.6       | ± | 0.2   | 11  |
| SpiHΔCterm             | No cNMP    | -0.015 | ± | 0.006 | 1                  | ± | 0     | -97                   | ± | 3   | -6.6       | ± | 0.7   | 4   |
| 359:360                | No cNMP*   | 0.023  | ± | 0.012 | 0.069              | ± | 0.015 | -33                   | ± | 4   | -5.9       | ± | 2.1   | 6   |
|                        | 1:1 cAMP   | 0.186  | ± | 0.024 | 1                  | ± | 0     | -38                   | ± | 3   | -8.3       | ± | 0.6   | 6   |
|                        | cGMP       | 0.069  | ± | 0.020 | 0.414              | ± | 0.075 | -46                   | ± | 2   | -10.1      | ± | 0.8   | 6   |
| 359:360                | No cNMP*   | 0.027  | ± | 0.005 | 0.052              | ± | 0.007 | -19                   | ± | 12  | -3.0       | ± | 1.5   | 3   |
|                        | 4:1 cAMP   | 0.187  | ± | 0.003 | 1                  | ± | 0     | -40                   | ± | 1   | -9.0       | ± | 0.1   | 3   |
|                        | cGMP       | 0.082  | ± | 0.009 | 0.565              | ± | 0.021 | -50                   | ± | 1   | -10.9      | ± | 0.3   | 3   |
| 359:363                | No cNMP*   | 0.009  | ± | 0.015 | 0.035              | ± | 0.007 | -71                   | ± | 17  | -9.0       | ± | 5.2   | 4   |
|                        | cAMP       | 0.022  | ± | 0.017 | 1                  | ± | 0     | -66                   | ± | 1   | -7.0       | ± | 0.5   | 4   |
|                        | cGMP       | 0.015  | ± | 0.015 | 0.362              | ± | 0.045 | -80                   | ± | 1   | -8.0       | ± | 0.6   | 4   |
| 355:360                | No cNMP    |        |   |       | 0.030              | ± | 0.001 |                       |   |     |            |   |       | 3   |
|                        | cAMP       |        |   |       | 0.959              | ± | 0.013 |                       |   |     |            |   |       | 3   |
|                        | cGMP       |        |   |       | 0.211              | ± | 0.049 |                       |   |     |            |   |       | 3   |
| 350:360                | No cNMP    |        |   |       | 0.056              | ± | 0.011 |                       |   |     |            |   |       | 3   |
|                        | cAMP       |        |   |       | 0.942              | ± | 0.037 |                       |   |     |            |   |       | 3   |
|                        | cGMP       |        |   |       | 0.283              | ± | 0.016 |                       |   |     |            |   |       | 3   |
| 350:363                | No cNMP    |        |   |       | 0.210              | ± | 0.046 |                       |   |     |            |   |       | 5   |
|                        | cAMP       |        |   |       | 0.958              | ± | 0.011 |                       |   |     |            |   |       | 5   |
|                        | cGMP       |        |   |       | 0.490              | ± | 0.063 |                       |   |     |            |   |       | 5   |
| 350:367                | No cNMP    |        |   |       | 0.685              | ± | 0.043 |                       |   |     |            |   |       | 3   |
|                        | cAMP       |        |   |       | 0.979              | ± | 0.007 |                       |   |     |            |   |       | 3   |
|                        | cGMP       |        |   |       | 0.893              | ± | 0.007 |                       |   |     |            |   |       | 3   |
| 359:367                | No cNMP    | 0.265  | ± | 0.034 | 0.515              | ± | 0.051 | -79                   | ± | 4   | -8.8       | ± | 0.4   | 7   |
|                        | 1:1 cAMP   | 0.780  | ± | 0.021 | 1                  | ± | 0     | -54                   | ± | 2   | -11.8      | ± | 0.7   | 7   |
|                        | cGMP       | 0.488  | ± | 0.039 | 0.874              | ± | 0.030 | -69                   | ± | 3   | -9.2       | ± | 0.6   | 7   |
| 359:367                | No cNMP    | 0.196  | ± | 0.024 | 0.366              | ± | 0.019 | -85                   | ± | 4   | -7.7       | ± | 0.9   | 3   |
|                        | 4:1 cAMP   | 0.740  | ± | 0.008 | 1                  | ± | 0     | -59                   | ± | 4   | -13.9      | ± | 1.4   | 3   |
|                        | cGMP       | 0.423  | ± | 0.014 | 0.852              | ± | 0.006 | -72                   | ± | 4   | -10.9      | ± | 0.7   | 3   |
| A4                     | No cNMP ‡  | 0.034  | ± | 0.016 |                    |   |       | -48                   | ± | 6   | 6.8        | ± | 0.4   | 3   |
|                        | No cNMP ‡  | 0.014  | ± | 0.007 |                    |   |       | -73                   | ± | 8   | -15.4      | ± | 5.0   | 3   |
|                        | cAMP       | 0.090  | ± | 0.019 | 1                  | ± | 0     | -40                   | ± | 4   | -6.9       | ± | 0.5   | 3   |
|                        | cGMP ‡     | 0.274  | ± | 0.003 |                    |   |       | -59                   | ± | 4   | 6.8        | ± | 1.1   | 3   |
|                        | cGMP ‡     | 0.047  | ± | 0.011 |                    |   |       | -61                   | ± | 3   | -9.5       | ± | 2.9   | 3   |
| A6                     | No cNMP ‡  | 0.232  | ± | 0.049 |                    |   |       | -62                   | ± | 8   | 11.3       | ± | 0.7   | 3   |
|                        | No cNMP ‡  | 0.336  | ± | 0.020 |                    |   |       | -34                   | ± | 3   | -17.3      | ± | 2.4   | 3   |
|                        | cAMP       | 0.469  | ± | 0.027 | 1                  | ± | 0     | -3                    | ± | 7   | -16.0      | ± | 2.4   | 3   |
|                        | cGMP       | 0.333  | ± | 0.004 | 0.906              | ± | 0.019 | -23                   | ± | 5   | -12.9      | ± | 1.6   | 3   |
| R350A                  | No cNMP ‡  | 0.012  | ± | 0.017 |                    |   |       | 11                    | ± | 5   | 11.5       | ± | 1.0   | 3   |
|                        | No cNMP ‡  | 0.006  | ± | 0.001 |                    |   |       | -11                   | ± | 9   | -11.4      | ± | 1.2   | 3   |
|                        | cAMP       | 0.079  | ± | 0.013 | 1                  | ± | 0     | -6                    | ± | 7   | -10.2      | ± | -13.7 | 3   |
|                        | cGMP       | 0.079  | ± | 0.008 | 0.317              | ± | 0.048 | -19                   | ± | 7   | 0.5        | ± | 2.6   | 3   |
| F351A                  | No cNMP*   | 0.023  | ± | 0.002 |                    |   |       | 93                    | ± | 75  | 47.5       | ± | 17.6  | 3   |
|                        | No cNMP ‡* | 0.013  | ± | 0.010 |                    |   |       | -71                   | ± | 3   | -3.7       | ± | 0.3   | 3   |
|                        | cAMP       | 0.011  | ± | 0.001 | 1                  | ± | 0     | -81                   | ± | 1   | -6.7       | ± | -6.0  | 3   |
|                        | cGMP       | 0.005  | ± | 0.003 | 0.005              | ± | 0.029 | -80                   | ± | 1   | 0.2        | ± | 0.3   | 3   |
| Q354A                  | No cNMP*   | 0.002  | ± | 0.001 | 0.035              | ± | 0.005 | -62                   | ± | 3   | -7.2       | ± | 1.6   | 3   |
|                        | cAMP       | 0.012  | ± | 0.005 | 1                  | ± | 0     | -65                   | ± | 1   | -6.5       | ± | 0.7   | 3   |
|                        | cGMP       | 0.004  | ± | 0.003 | 0.262              | ± | 0.043 | -70                   | ± | 1   | -7.8       | ± | 1.5   | 3   |
| W355A                  | No cNMP*   | 0.008  | ± | 0.012 | 0.011              | ± | 0.001 | -190                  | ± | 171 | -135.3     | ± | 134.7 | 3   |
|                        | cAMP       | 0.026  | ± | 0.004 | 1                  | ± | 0     | -40                   | ± | 2   | -5.2       | ± | 0.5   | 3   |
|                        | cGMP*      | 0.006  | ± | 0.021 | 0.061              | ± | 0.012 | -25                   | ± | 4   | -7.0       | ± | 6.1   | 3   |
| E356A                  | No cNMP ‡  | 0.081  | ± | 0.015 |                    |   |       | -52                   | ± | 4   | 8.9        | ± | 3.6   | 3   |
|                        | No cNMP ‡  | 0.028  | ± | 0.003 |                    |   |       | -67                   | ± | 3   | -7.0       | ± | 2.6   | 3   |
|                        | cAMP       | 0.104  | ± | 0.021 | 1                  | ± | 0     | -47                   | ± | 1   | -8.2       | ± | 0.3   | 3   |
|                        | cGMP       | 0.047  | ± | 0.008 | 0.555              | ± | 0.058 | -64                   | ± | 1   | -6.9       | ± | 0.3   | 3   |
| R367A                  | No cNMP    | 0.051  | ± | 0.008 | 0.880              | ± | 0.018 | -70                   | ± | 3   | -7.7       | ± | 1.5   | 3   |
|                        | cAMP       | 0.058  | ± | 0.009 | 1                  | ± | 0     | -63                   | ± | 3   | -8.1       | ± | 0.4   | 3   |
|                        | cGMP       | 0.051  | ± | 0.012 | 1.024              | ± | 0.009 | -69                   | ± | 2   | -6.8       | ± | 0.7   | 3   |
| D471A                  | No cNMP    | 0.011  | ± | 0.006 | 0.451              | ± | 0.051 | -64                   | ± | 2   | -6.9       | ± | 0.4   | 3   |
|                        | cAMP       | 0.016  | ± | 0.004 | 1                  | ± | 0     | -59                   | ± | 1   | -6.5       | ± | 0.6   | 3   |
|                        | cGMP       | 0.013  | ± | 0.003 | 0.991              | ± | 0.043 | -68                   | ± | 1   | -6.8       | ± | 0.6   | 3   |
| ΔQWE                   | No cNMP    |        |   |       | 0.572              | ± | 0.039 |                       |   |     |            |   |       | 5   |
|                        | cAMP       |        |   |       | 0.970              | ± | 0.008 |                       |   |     |            |   |       | 5   |
|                        | cGMP       |        |   |       | 0.872              | ± | 0.029 |                       |   |     |            |   |       | 3   |
| ΔQAF                   | No cNMP    | 0.319  | ± | 0.029 | 0.650              | ± | 0.038 | -37                   | ± | 2   | 7.7        | ± | 0.5   | 5   |
|                        | cAMP       |        |   |       | 1                  | ± | 0     |                       |   |     |            |   |       | 5   |

Data shown as mean ± s.e.m. \* not well determined. ‡ product of two Boltzmann eqn.

## Supplemental figures:

Fig. S1. Sequence alignment of the S4-S5 regions of several HCN and related channels.

HCN1, human NM\_021072.3; HCN2, human NM\_001194.3; HCN2, human NM\_020897.2; HCN4, human NM\_005477.2; HCN1, mouse NM\_010408.3; HCH2, mouse NM\_008226.2; SpHCN, invertebrate NM\_214564.1; CNGA1, bovine 1.NM\_174278.2; Tax4, *C. elegans* NM\_066632.4; EAG1, mouse NM\_001038607.2; EAG, rat 1.NM\_031742.1; ERG, human NM\_172057.2; Kv1.2, rat NM\_023954.1

Fig. S2. SpHCN<sub>WT</sub> current families recorded in the absence and presence of ligand along with block by ZD7288, an HCN channel specific blocker.

(A-D) SpHCN<sub>WT</sub> currents measured (A), in the absence of ligand, (B) presence of 1 mM cGMP, (C) 1 mM cAMP, and (D) 1 mM cAMP + 100  $\mu$ M ZD7288 in response to test voltage steps from -20 mV and -120 mV in increments of -10 mV followed by a voltage step to +40 mV. (E) SpHCN<sub>WT</sub> currents measured during voltages steps to -100 and +100 mV as ZD7288 was applied to inside of patch. (F) Normalized current amplitudes measured at the end of the -100 mV pulse first in 1 mM cAMP (red bar) then in 1 mM cAMP + 100  $\mu$ M ZD7288 (black bar). The data were fit by a single exponential with  $\tau = 5.7$  s.

Fig. S3. Functional split channels require co-expression of both VSD and PD, and reduced VSD-PD coupling is not a property of the VSD:PD ratio.

Oocytes were injected with different ratios of VSD:PD cRNAs: 4:1, 1:1, 0:1. (A) ZD-subtracted currents from split spHCN<sub>(359:360)</sub> channels with a break in the S4-S5 linker, (B) ZD-subtracted currents from split spHCN<sub>(359:367)</sub> channels with the S4-S5 linker + S5<sub>N-term</sub> region deleted. (C) GV curves from split spHCN<sub>(359:360)</sub> channels with cRNA ratios 4:1 (open symbols) and 1:1 (filled symbols). (D) GV curves from split spHCN<sub>(359:367)</sub> channels.

Fig. S4. Simple 4 state model for closed state inactivation.

(A) Model showing closed ( $C_0$ ,  $C_1$ ), open (O), and inactivated (I) states with equilibrium constants  $H(V)$ ,  $L$ , and  $J$ .  
(B) Po vs voltage plot shows activation without inactivation (red,  $J = 0$ ), activation with voltage-independent inactivation (black, dashed,  $J = 200$ ), and activation with voltage-dependent inactivation (black, solid,  $J(V) = 0.1 * e^{(-V/8)}$ ). For all traces,  $H(V) = 10^{-6}e^{(-V/8)}$  and  $L = 100$ .

Fig. S5. A simple state diagram which corresponds to the HA model shown in Fig. 2A.

State diagram shows how the equilibrium constants,  $H$ ,  $K$ , and  $L$ , with coupling factors  $F$ ,  $C$ , and  $E$  explicitly affect specific transitions.

Fig. S1

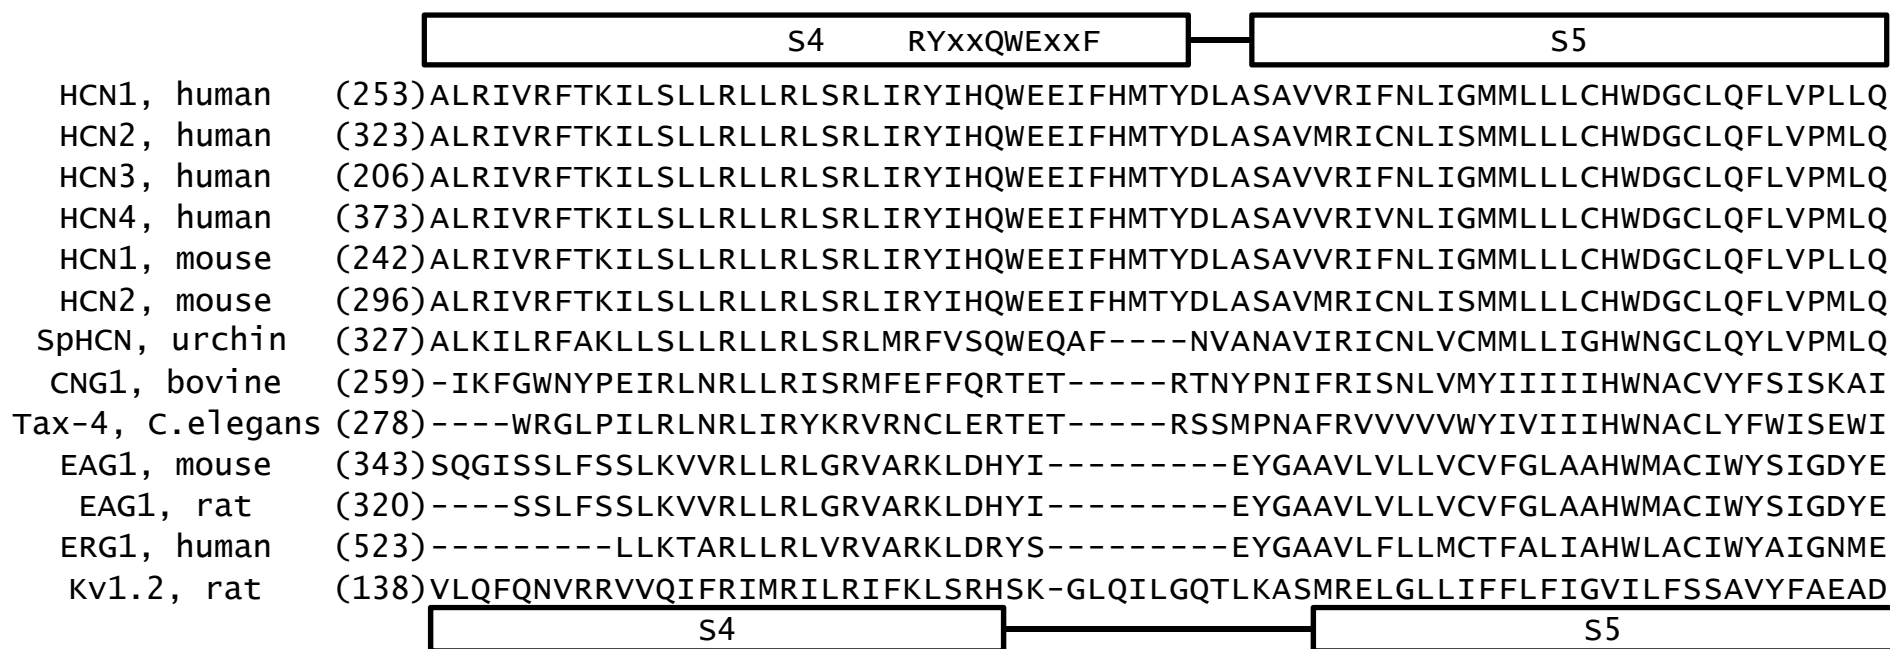

Fig. S2

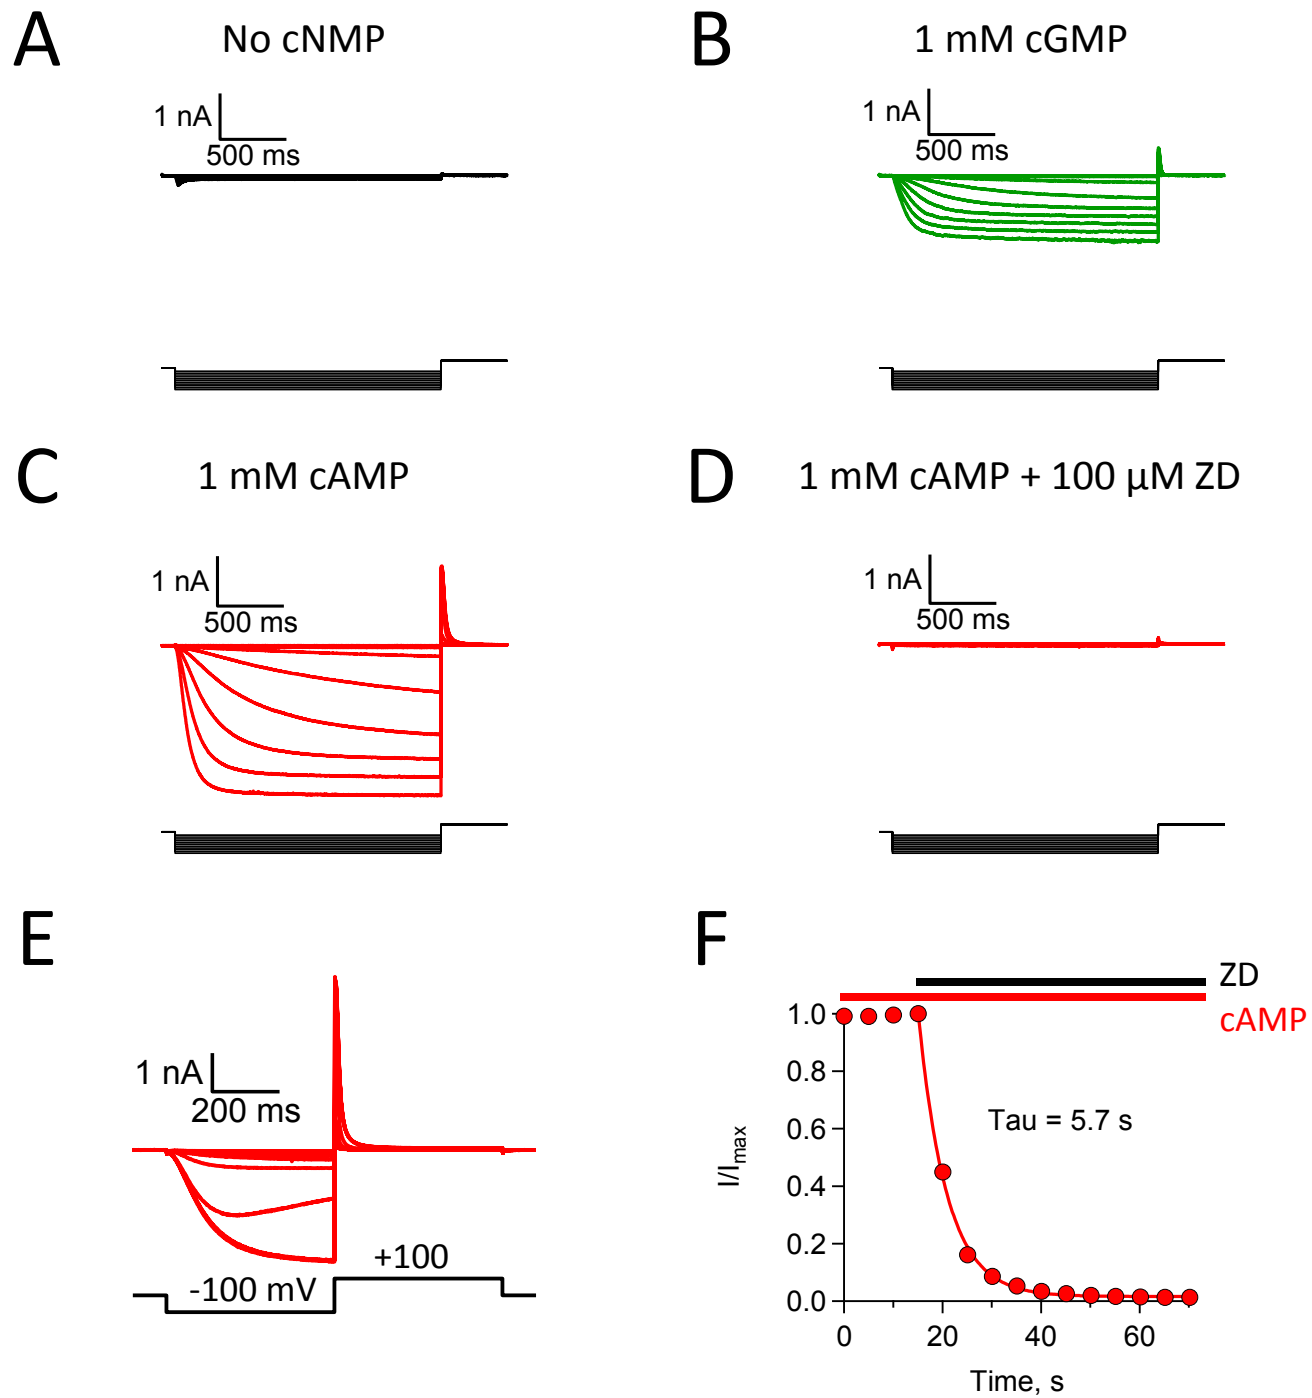

Fig. S3

**A**

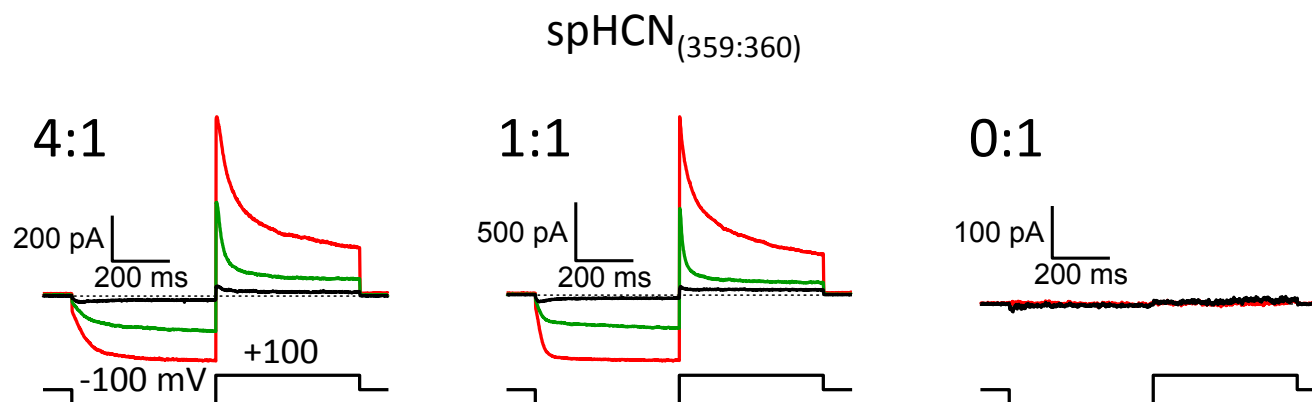

**B**

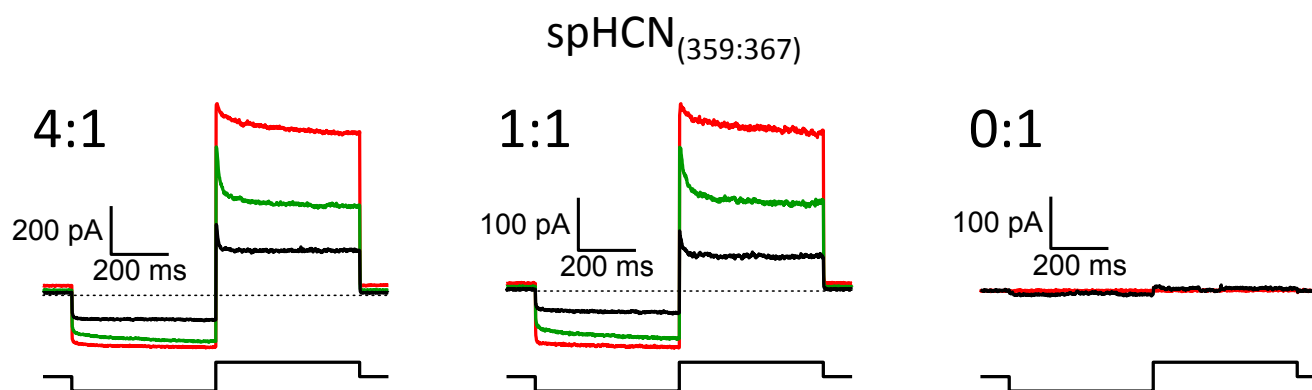

**C** spHCN<sub>(359:360)</sub>

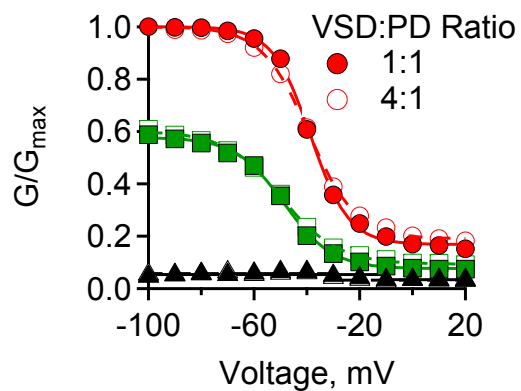

**D** spHCN<sub>(359:367)</sub>

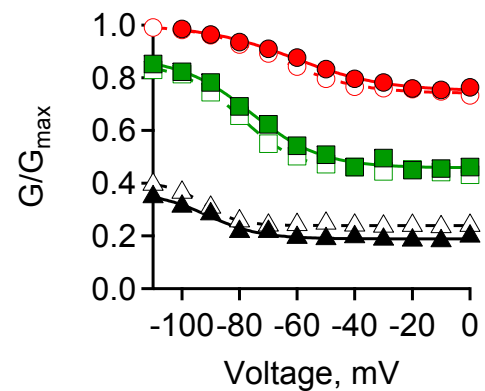

Fig. S4

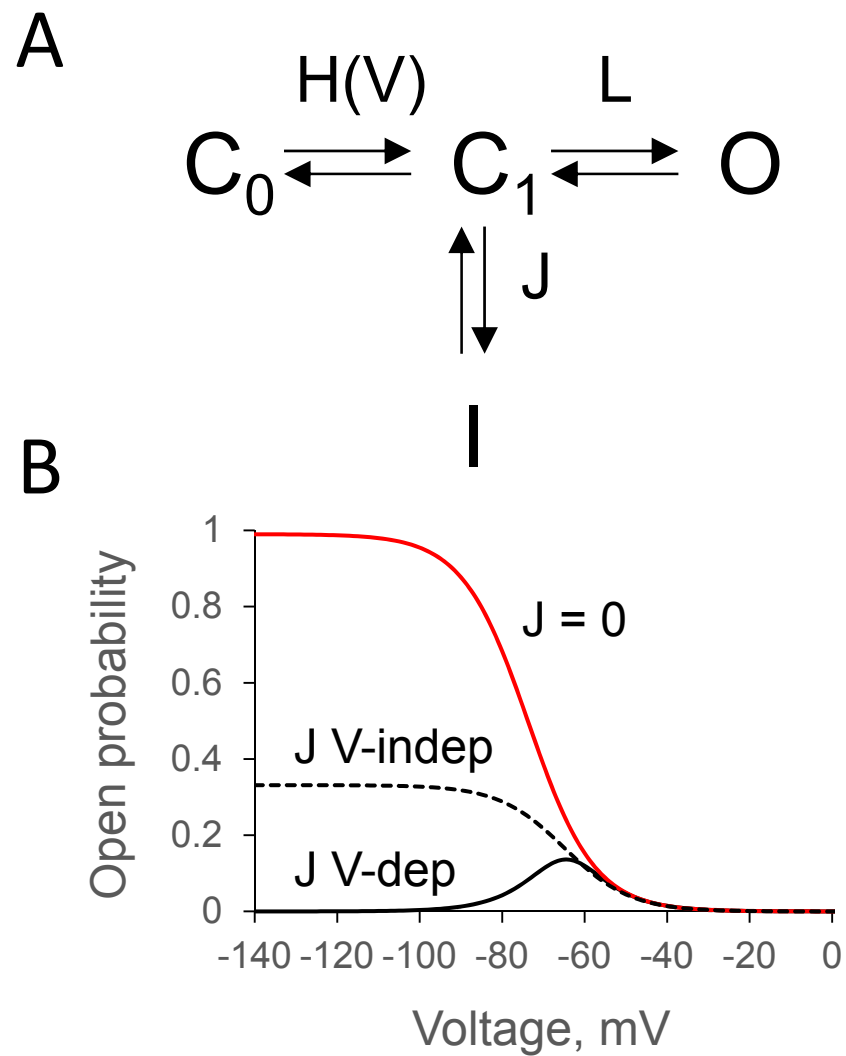

Fig. S5

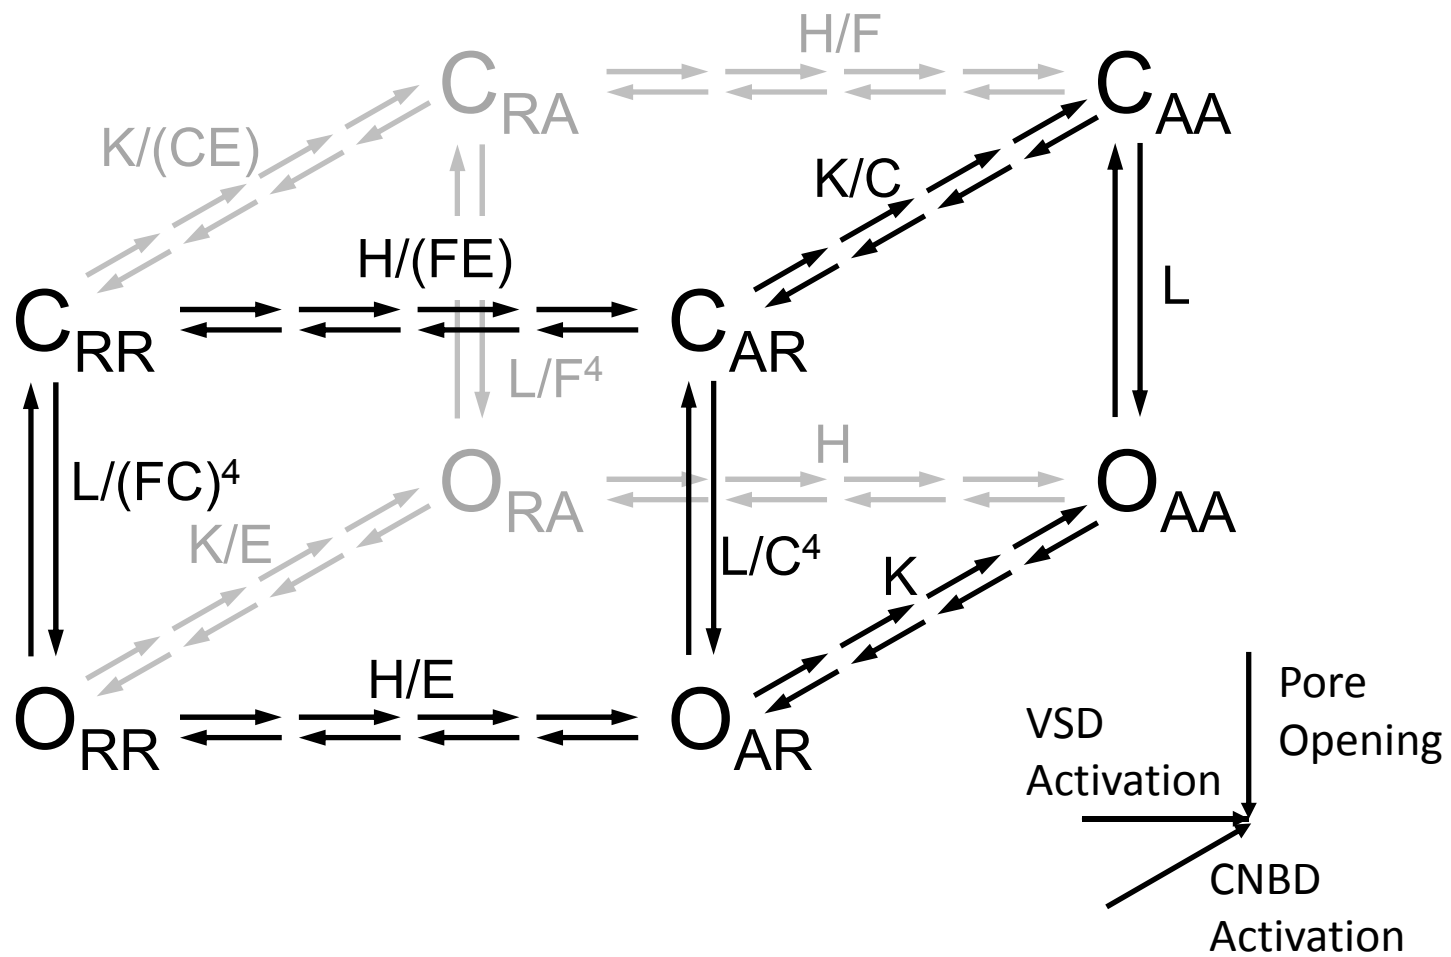

Supplement: pnas.1805596115.sapp.pdf [file pnas.1805596115.sapp.pdf]
